# Supplementary material for: A conserved and regulated mechanism drives endosomal Rab transition
Source: eLife. 2020 May 11;9:e56090. doi: 10.7554/eLife.56090 (PMC7239660; doi:10.7554/eLife.56090)
Supplement: Figure 1—source data 1. [file elife-56090-fig1-data1.xlsx]

## Sheet: Sheet1
		Experiment I			Percent			mean		STDEV
	no. Of FM4-64 positive structures	≤4	>4	Sum	≤4	>4		≤4	>4	≤4	>4
	WT	233	24	257	90.6615	9.33852		86.6199	13.3801	5.7156	5.7156
	mon1∆	26	323	349	7.44986	92.5501		7.52928	92.4707	0.112316	0.112316
	vps30∆	339	9	348	97.4138	2.58621		97.0875	2.91254	0.4615	0.4615
	vps21∆ ypt52∆	124	79	203	61.0837	38.9163		66.9704	33.0296	8.32505	8.32505
	vps21∆ ypt52∆ vps30∆	19	229	248	7.66129	92.3387		11.1076	88.8924	4.87388	4.87388
		Experiment II			Percent
	no. Of FM4-64 positive structures	≤4	>4	Sum	≤4	>4
	WT	237	50	287	82.5784	17.4216
	mon1∆	14	170	184	7.6087	92.3913
	vps30∆	239	8	247	96.7611	3.23887
	vps21∆ ypt52∆	102	38	140	72.8571	27.1429
	vps21∆ ypt52∆ vps30∆	31	182	213	14.554	85.446
