# Supplementary material for: A conserved and regulated mechanism drives endosomal Rab transition
Source: eLife. 2020 May 11;9:e56090. doi: 10.7554/eLife.56090 (PMC7239660; doi:10.7554/eLife.56090)
Supplement: Figure 2—figure supplement 1—source data 1. [file elife-56090-fig2-figsupp1-data1.xlsx]

## Sheet: raw Data Vps21
	20190724							20191001				20191119			20191010				20191115
	1 repeat biologic							2 repeat biologic							3 repeat semi-biologic
		PO	PO-PIP	PO-Vps21	PO-PIP-Vps21	Ctrl.			PO	PO-PIP	PO-Vps21	PO-PIP-Vps21	Ctrl.			PO	PO-PIP	PO-Vps21	PO-PIP-Vps21	Ctrl.
	Pellet 1	66930.5	153958	-116518	98132.2	39305.1		Pellet 1	56790.8	110172	100700	206361	27304.1		Pellet 1	49033.7	76203.8	116821	183791	31225.6
	SN 1	248331	224741	-272216	120071	208456		SN 1	216519	181392	231160	175649	153568		SN 1	249260	228611	232080	215429	173022
	Pellet 2	74471.4	123390	-126874	103340	45667.7		Pellet 2	66003.5	104392	88950.6	162421	29462.9		Pellet 2	56201.3	95698.7	152673	144513	32485.1
	SN 2	239114	219924	-266570	126392	254607		SN 2	223467	175901	253687	161318	162902		SN 2	250059	216643	242220	184490	221236
	Pellet 3	70440.8	136601	-127602	115265	55454.8		Pellet 3	82042.1	104435	96705.3	153947	25832.6		Pellet 3	54011.7	89444.8	142694	165244	39625
	SN 3	318366	260052	-210993	160383	272215		SN 3	226399	179534	231310	146514	145923		SN 3	205375	217877	239625	223923	223552
	Sum 1	315261	378699	-388734	218204	247761		Sum 1	273309	291564	331860	382010	180872		Sum 1	298293	304815	348902	399220	204248
	Sum 2	313585	343314	-393444	229732	300275		Sum 2	289471	280293	342637	323739	192365		Sum 2	306261	312342	394893	329002	253722
	Sum 3	388807	396653	-338595	275649	327670		Sum 3	308441	283969	328015	300461	171756		Sum 3	259386	307322	382318	389168	263177
	% pellet 1	21.2302	40.6544	29.9737	44.9728	15.8641		% pellet 1	20.779	37.7865	30.3442	54.0197	15.0958		% pellet 1	16.4381	25	33.4826	46.0375	15.2881
	% pellet 2	23.7484	35.9408	32.247	44.9829	15.2086		% pellet 2	22.8015	37.244	25.9606	50.1704	15.3161		% pellet 2	18.3508	30.639	38.6618	43.9245	12.8035
	% pellet 3	18.1172	34.4384	37.6857	41.8161	16.924		% pellet 3	26.599	36.7771	29.482	51.237	15.0403		% pellet 3	20.8229	29.1046	37.3233	42.461	15.0564
	mean %	21.0319	37.0112	33.3022	43.9239	15.9989		mean %	23.3931	37.2692	28.5956	51.809	15.1508		mean %	18.5372	28.2479	36.4892	44.141	14.3827
	stdev	2.30321	2.64815	3.23561	1.49047	0.706745		stdev	2.41257	0.412497	1.89618	1.6227	0.119111		stdev	1.79493	2.3805	2.19511	1.46814	1.12066

## Sheet: raw data Ypt10
	20200331				20200401				20200402
	1 Repeat				1 Repeat				1 Repeat
		PO-Ypt10	PO-PIP-Ypt10			PO-Ypt10	PO-PIP-Ypt10			PO-Ypt10	PO-PIP-Ypt10
	Pellet 1	17059	24975.5		Pellet 1	8599.12	7833.58		Pellet 1	2442.23	3478.25
	SN 1	25806.8	24967.6		SN 1	21896.5	9373.96		SN 1	5100.03	4668.45
	Pellet 2	17516.7	23920.8		Pellet 2	4964	7188.67		Pellet 2	3998.3	3073.97
	SN 2	27361.1	21617.5		SN 2	14443.2	9769.36		SN 2	10103.2	3298.16
	Pellet 3	18715	21275.7		Pellet 3	7826.25	8133.93		Pellet 3	3117.19	1819.94
	SN 3	30383.5	18265.4		SN 3	13739	11274		SN 3	8252.17	2242.63
	Sum 1	42865.8	49943.1		Sum 1	30495.7	17207.5		Sum 1	7542.26	8146.7
	Sum 2	44877.8	45538.2		Sum 2	19407.2	16958		Sum 2	14101.5	6372.12
	Sum 3	49098.5	39541.1		Sum 3	21565.3	19407.9		Sum 3	11369.4	4062.57
	% pellet 1	39.7963	50.0079		% pellet 1	28.1979	45.5241		% pellet 1	32.3806	42.6952
	% pellet 2	39.032	52.5289		% pellet 2	25.5781	42.391		% pellet 2	28.3537	48.2408
	% pellet 3	38.1172	53.8065		% pellet 3	36.291	41.9103		% pellet 3	27.4175	44.7977
	mean %	38.9818	52.1145		mean %	30.0223	43.2751		mean %	29.3839	45.2446
	stdev	0.686401	1.57823		stdev	4.55982	1.60233		stdev	2.15318	2.28593

## Sheet: evaluation
		PO-Ypt10	PO-PIP-Ypt10	Ctrl.		t.test		PO-Ypt10 zu PO-PIP-Ypt10
	1 repeat	38.9818	52.1145	15.9989				0.0272182
	2 repeat	30.0223	43.2751	15.1508
	3 repeat	29.3839	45.2446	14.3827
	mean	32.796	46.8781	15.1774
	stdev	4.38179	3.78898	0.660106
	n	3	3	3
