# Supplementary material for: A conserved and regulated mechanism drives endosomal Rab transition
Source: eLife. 2020 May 11;9:e56090. doi: 10.7554/eLife.56090 (PMC7239660; doi:10.7554/eLife.56090)
Supplement: Figure 2—figure supplement 2—source data 1. [file elife-56090-fig2-figsupp2-data1.xlsx]

## Sheet: Raw Data
		Ctrl -	PI3P	PI5P	PI3,4P	PI3,5P	PI4,5P	PS	PO neutral
		10956.1	71627.5	45871.6	36872.5	38768.7	35643.1	54412.5	18930.3
		73935.2	129026	119258	63907.3	57919.8	61073.1	76423.6	72172.8
		11832.1	92352.3	64724.8	30604.3	36208.7	38449.8	44993.7	22001.2
		75835.1	143761	171754	49570.3	72981.9	74445.9	72789.6	74489
		13996.2	81525.7	84542	41258.5	43598.9	39307.6	36092.1	21347.4
		78652.9	134565	173349	59511.1	84593.4	71480.8	60126.5	75466.2
	% Pellet1	12.906	35.697	27.7792	36.5872	40.0965	36.8533	41.5883	20.779
	% SN 1	87.094	64.303	72.2208	63.4128	59.9035	63.1467	58.4117	79.221
	%Pellet 2	13.4966	39.1135	27.3702	38.1721	33.161	34.0578	38.2004	22.8015
	% SN 2	86.5034	60.8865	72.6298	61.8279	66.839	65.9422	61.7996	77.1985
	% Pellet 3	15.1066	37.7274	32.7821	40.9434	34.0106	35.4799	37.5105	22.05
	%SN 3	84.8934	62.2726	67.2179	59.0566	65.9894	64.5201	62.4895	77.95
		Ctrl -	PI3P	PI5P	PI3,4P	PI3,5P	PI4,5P	PS	PO neutral
	MW Pellet	13.8364	37.5127	29.3105	38.5676	35.756	35.4637	39.0997	21.8768
	MW SN	86.1636	62.4873	70.6895	61.4324	64.244	64.5363	60.9003	78.1232
	STABW.	0.929989	1.40303	2.46047	1.80024	3.08873	1.14133	1.78207	0.834714
Lipid Mixes	mol %	Ctrl -	PI3P	PI5P	PI3,4P	PI3,5P	PI4,5P	PS	PO neutral
added on 20200206	POPC		80	80	81	81	81	78	82
	POPE		18	18	18	18	18	18	18
	PI3P		2
	PI5P			2
	PI(3,4)P2				1
	PI(3,5)P2					1
	PI(4,5)P2						1
	PS							4
2 mol% PI(X)P, 1 mol% PI(X,X)P2, 4 mol% PS for a total of 4 mol% negative charge each
