# Supplementary material for: A conserved and regulated mechanism drives endosomal Rab transition
Source: eLife. 2020 May 11;9:e56090. doi: 10.7554/eLife.56090 (PMC7239660; doi:10.7554/eLife.56090)
Supplement: Figure 2—source data 1. [file elife-56090-fig2-data1.xlsx]

## Sheet: evaluation
		PO	PO-PIP	PO-Vps21	PO-PIP-Vps21	Ctrl.		t.test	PO zu PO-PIP	PO zu PO-Vps21	PO-PIP zu PO-PIP-Vps21	PO-Vps21 zu PO-PIP-Vps21	ctrl zu PO
	1 repeat	21.0319	37.0112	33.3022	43.9239	15.9989			0.0303554	0.0177359	0.0350163	0.016672	0.0423368
	2 repeat	23.3931	37.2692	28.5956	51.809	15.1508
	3 repeat	18.5372	28.2479	36.4892	44.141	14.3827
	mean	20.9874	34.1761	32.7957	46.6247	15.1774
	stdev	1.98266	4.1932	3.24242	3.66699	0.660106
	n	3	3	3	3	3

## Sheet: raw data
	20190724							20191001				20191119			20191010				20191115
	1 repeat biologic							2 repeat biologic							3 repeat semi-biologic
		PO	PO-PIP	PO-Vps21	PO-PIP-Vps21	Ctrl.			PO	PO-PIP	PO-Vps21	PO-PIP-Vps21	Ctrl.			PO	PO-PIP	PO-Vps21	PO-PIP-Vps21	Ctrl.
	Pellet 1	66930.5	153958	-116518	98132.2	39305.1		Pellet 1	56790.8	110172	100700	206361	27304.1		Pellet 1	49033.7	76203.8	116821	183791	31225.6
	SN 1	248331	224741	-272216	120071	208456		SN 1	216519	181392	231160	175649	153568		SN 1	249260	228611	232080	215429	173022
	Pellet 2	74471.4	123390	-126874	103340	45667.7		Pellet 2	66003.5	104392	88950.6	162421	29462.9		Pellet 2	56201.3	95698.7	152673	144513	32485.1
	SN 2	239114	219924	-266570	126392	254607		SN 2	223467	175901	253687	161318	162902		SN 2	250059	216643	242220	184490	221236
	Pellet 3	70440.8	136601	-127602	115265	55454.8		Pellet 3	82042.1	104435	96705.3	153947	25832.6		Pellet 3	54011.7	89444.8	142694	165244	39625
	SN 3	318366	260052	-210993	160383	272215		SN 3	226399	179534	231310	146514	145923		SN 3	205375	217877	239625	223923	223552
	Sum 1	315261	378699	-388734	218204	247761		Sum 1	273309	291564	331860	382010	180872		Sum 1	298293	304815	348902	399220	204248
	Sum 2	313585	343314	-393444	229732	300275		Sum 2	289471	280293	342637	323739	192365		Sum 2	306261	312342	394893	329002	253722
	Sum 3	388807	396653	-338595	275649	327670		Sum 3	308441	283969	328015	300461	171756		Sum 3	259386	307322	382318	389168	263177
	% pellet 1	21.2302	40.6544	29.9737	44.9728	15.8641		% pellet 1	20.779	37.7865	30.3442	54.0197	15.0958		% pellet 1	16.4381	25	33.4826	46.0375	15.2881
	% pellet 2	23.7484	35.9408	32.247	44.9829	15.2086		% pellet 2	22.8015	37.244	25.9606	50.1704	15.3161		% pellet 2	18.3508	30.639	38.6618	43.9245	12.8035
	% pellet 3	18.1172	34.4384	37.6857	41.8161	16.924		% pellet 3	26.599	36.7771	29.482	51.237	15.0403		% pellet 3	20.8229	29.1046	37.3233	42.461	15.0564
	mean %	21.0319	37.0112	33.3022	43.9239	15.9989		mean %	23.3931	37.2692	28.5956	51.809	15.1508		mean %	18.5372	28.2479	36.4892	44.141	14.3827
	stdev	2.30321	2.64815	3.23561	1.49047	0.706745		stdev	2.41257	0.412497	1.89618	1.6227	0.119111		stdev	1.79493	2.3805	2.19511	1.46814	1.12066
