# Supplementary material for: A conserved and regulated mechanism drives endosomal Rab transition
Source: eLife. 2020 May 11;9:e56090. doi: 10.7554/eLife.56090 (PMC7239660; doi:10.7554/eLife.56090)
Supplement: Figure 4—source data 1. [file elife-56090-fig4-data1.xlsx]

## Sheet: Tabelle1
					t1				k obs (=1/t1)
		Vol in µl	800														kcat/Km (sec-1M-1)
		pmole	µM	M	Exp1	Exp2			Exp1	Exp2							(as derived from linear fit)
Titration GEF	Dimer	40	0.05	5e-08	211.066	140.297			0.00473785	0.00712774							Exp1	Exp2		mean	STDV
		10	0.0125	1.25e-08	243.6	156.928			0.00410509	0.00637235						Mon1-Ccz1	20249	20144		20196.5	74.2462
		2.5	0.003125	3.125e-09	268.639				0.00372247							CG8270-Mon1-Ccz1	43109	24161		33635	13398.3
	Trimer	40	0.05	5e-08	212.446	166.025			0.00470708	0.00602319
		10	0.0125	1.25e-08	195.256	226.932			0.00512148	0.00440661
		2.5	0.003125	3.125e-09	343.134				0.00291431
