# Supplementary material for: A conserved and regulated mechanism drives endosomal Rab transition
Source: eLife. 2020 May 11;9:e56090. doi: 10.7554/eLife.56090 (PMC7239660; doi:10.7554/eLife.56090)
Supplement: Figure 4—source data 2. [file elife-56090-fig4-data2.xlsx]

## Sheet: Tabelle1
						t1 derived from linear fit			k obs (=1/t1)
																			recruiter [nM]	Average kobs	STDV
		Vol in µl	800													Mon1-Ccz1			1500	0.0057957	0.0003765
		pmole	µM	M	Exp1	Exp2	Exp3		Exp1	Exp2	Exp3								150	0.00326392	0.000706784
Titration Recruiter	Dimer	0	1.5	1.5e-06	180.849	164.964			0.00552948	0.00606193									15	0.00118131	0.000212519
		0	0.15	1.5e-07	376.559	247.57	322.907		0.00265562	0.00403926	0.00309687								0	0.00076896	0.00133188
		0	0.015	1.5e-08	958.756	701.256	930.326		0.00104302	0.00142601	0.00107489					Mon1-Ccz1-CG8270			1500	0.0053507	0.00132822
		0	0	0	-253930000	433.485	-2.38e+99		-3.93809e-09	0.00230688	-4.20168e-100								150	0.00294245	0.000459305
																			15	0.00124784	0.000833951
	Trimer	0	1.5	1.5e-06	226.68	158.985			0.00441151	0.0062899									0	0.000462858	0.000318371
		0	0.15	1.5e-07	411.399	301.295	324.927		0.00243073	0.00331901	0.00307761
		0	0.015	1.5e-08	2166.06	862.561	471.14		0.000461669	0.00115934	0.00212251					w/o GEF			1500	2.12036e-08
		0	0	0	8158	1951.18	1327.16		0.000122579	0.00051251	0.000753486
