# Supplementary material for: A conserved and regulated mechanism drives endosomal Rab transition
Source: eLife. 2020 May 11;9:e56090. doi: 10.7554/eLife.56090 (PMC7239660; doi:10.7554/eLife.56090)
Supplement: Figure 5—source data 1. [file elife-56090-fig5-data1.xlsx]

## Sheet: Tabelle1
	Max Fusion		Time	250nM GDI-Ypt7 50nM MC1 -Ypt10	250nM GDI-Ypt7 50nM MC1 +Ypt10	250nM GDI-Ypt7 25nM MC1 -Ypt10	250nM GDI-Ypt7 25nM MC1 +Ypt10	250nM GDI-Ypt7 12,5nM MC1 -Ypt10	250nM GDI-Ypt7 12,5nM MC1 +Ypt10	250nM GDI-Ypt7 0nM MC1 -Ypt10	250nM GDI-Ypt7 0nM MC1 +Ypt10	0nM GDI-Ypt7 (!) 50nM MC1 -Ypt10	0nM GDI-Ypt7 50nM MC1 +Ypt10	250nM GDI-Ypt7 100nM MC1	250nM GDI-Ypt7 50nM MC1	250nM GDI-Ypt7 25nM MC1	250nM GDI-Ypt7 12,5nM MC1	250nM GDI-Ypt7 0nM MC1	0nM GDI-Ypt7 100nM MC1
	1.87704		30	0.916113	1.48149	0.947983	1.57728	0.981437	1.4605	0.987904	0.919576	0.967971	0.931014	1.35392	0.98595	1.01398	0.963706	1.00589	0.978516
	2.35189		30	0.998441	1.79394	1.11892	2.00277	1.08999	2.13321	1.02326	0.986463	0.965953	0.972451	1.85147	1.4925	1.13911	1.0708	0.997108	1.01816
	1.85462		30	1.00519	1.55934	0.969099	1.63439	1.01472	1.59925	1.0016	1.00618	0.927347	0.96602	1.5022	1.0725	1.0044	1.01725	1.03374	0.957475
			2019-12-04	-9.56479	54.8991	-5.93094	65.8215	-2.11653	52.506	-1.37922	-9.16987	-3.65194	-7.8658	40.3544	-1.60192	1.59398	-4.13822	0.671299	-2.44956
			2019-12-09	-0.115292	58.7284	8.79651	74.1752	6.65687	83.8241	1.72038	-1.00135	-2.51848	-2.03785	62.984	36.4303	10.29	5.23693	-0.213893	1.34346
			2019-12-10	0.606951	65.4491	-3.61573	74.2306	1.72251	70.119	0.187051	0.722569	-8.50127	-3.97607	58.7631	8.48361	0.51538	2.01795	3.94741	-4.97595
			Average	-3.02438	59.6922	-0.250052	71.4091	2.08762	68.8163	0.176072	-3.14955	-4.89056	-4.62657	54.0338	14.4373	4.13311	1.03889	1.46827	-2.02735
			STDEV	5.67567	5.34065	7.91961	4.83912	4.39808	15.6996	1.54983	5.28452	3.17791	2.96793	12.0333	19.7027	5.35921	4.76364	2.19214	3.18079
