# Supplementary material for: A conserved and regulated mechanism drives endosomal Rab transition
Source: eLife. 2020 May 11;9:e56090. doi: 10.7554/eLife.56090 (PMC7239660; doi:10.7554/eLife.56090)
Supplement: Figure 5—source data 2. [file elife-56090-fig5-data2.xlsx]

## Sheet: Tabelle1
Date of exp.	recruiter	Value Vps41	Value Ccz1	ratio				Average	STDV
2019-12-17	-	2182.41	283.849	7.68862	1		minus recruiter	1	0
	+	3640.94	170.314	21.3778	2.78045		plus recruiter	2.40251	0.534492
2019-12-18	-	3293.33	1506	2.1868	1
	+	8603.33	1943.23	4.42732	2.02456
