# Supplementary material for: A conserved and regulated mechanism drives endosomal Rab transition
Source: eLife. 2020 May 11;9:e56090. doi: 10.7554/eLife.56090 (PMC7239660; doi:10.7554/eLife.56090)
Supplement: Source data 1. [file elife-56090-data1.xlsx]

## Sheet: 1 over T1
	y0	y0	A1	A1	t1	t1	Statistics	Statistics
	Value	Error	Value	Error	Value	Error	Reduced Chi-Sqr	Adj. R-Square		Ypt10	conc MC1	1/T1		AVERAGE	STDV
2019_01_25_REP:Ypt10_GDI:Ypt7_25nMMC1	0.73315	0.00116	0.26104	0.000959643	490.095	5.23241	5.42706e-06	0.99868			25	0.00204042	25	0.00187489	0.000234103
2019_01_18_REP:Ypt10_GDI-Ypt7_25nMMC1	0.83532	0.00431	0.16068	0.0036	585.018	33.2926	3.90231e-05	0.97289			25	0.00170935	50	0.00364875	0.00125974
2019_01_18_REP:Ypt10_GDI-Ypt7_50nMMC1	0.76388	0.00439	0.20076	0.00858	220.288	21.8234	0.000835547	0.75556			50	0.00453952	100	0.00437323	0.00145983
2019_01_25_REP:Ypt10_GDI:Ypt7_50nMMC1	0.71993	0.00121	0.25767	0.00115	362.584	5.12577	1.63184e-05	0.99632			50	0.00275798
2018_11_09_GDI-Ypt7_REP-Ypt10recruiter_100nMMC1	0.71248	0.00242	0.233	0.00746	156.192	9.51972	0.000462371	0.86707			100	0.00640239
2018_11_09_GDI-Ypt7_REP-Ypt10recruiter_100nMMC1_repetition	0.69948	0.00117	0.3308	0.00163	274.109	3.66936	3.4823e-05	0.99529			100	0.00364819
2020_01_22 REP_Ypt10 100nM MC1 new buffer	0.63837	0.000842768	0.34112	0.00157	227.692	2.48381	2.86739e-05	0.99622			100	0.0043919
2019_02_12 REP-Ypt10_GDI:Ypt7_100nMMC1	0.65752	0.00126	0.35514	0.00135	327.822	3.80466	2.42946e-05	0.99715			100	0.00305044
2019_10_16_Recruiter assay 0nM MC1 REP-Vps21 _1	1.00777	0.00168	0.0117	0.00146	714.161	192.972	2.80493e-06	0.69359		Vps21	0	0.00140024	25	0.00127596	0.000147666
2019_01_25_REP:Vps21_GDI:Ypt7_25nMMC1	0.84605	0.00377	0.14357	0.00344	904.268	39.615	5.7107e-06	0.9926			25	0.00110587	50	0.00172125	0.000877309
2019_10_16_Recruiter assay 25nM MC1 REP-Vps21 _1	1.0128	0.0034	0.01366	0.00298	740.376	339.675	9.99593e-06	0.45427			25	0.00135067	100	0.00176261	0.000832278
2019_01_18_REP:Vps21_GDI-Ypt7_25nMMC1	0.82816	0.02059	0.17443	0.018	729.212	160.108	0.000389112	0.78105			25	0.00137134
2019_01_25_REP:Vps21_GDI:Ypt7_50nMMC1	0.74491	0.00169	0.23523	0.00141	455.351	8.25321	1.47988e-05	0.99572			50	0.00219611
2019_10_16_Recruiter assay 50nM MC1 REP-Vps21 _1	1.00597	0.00993	0.0204	0.00954	1410.71	962.378	6.91971e-06	0.56352			50	0.000708863
2019_01_18_REP:Vps21_GDI-Ypt7_50nMMC1	0.82988	0.01264	0.17735	0.0106	442.719	81.3832	0.000915203	0.68267			50	0.00225877
2018_11_09_GDI-Ypt7_REP-Vps21recruiter_100nMMC1	0.83198	0.00406	0.15454	0.00369	904.853	39.5762	6.5828e-06	0.99263			100	0.00110515
2018_11_09_GDI-Ypt7_REP-Vps21recruiter_100nMMC1_repetition	0.78116	0.00559	0.20278	0.00493	761.573	38.1549	2.43167e-05	0.98674			100	0.00131307
2019_01_15_REP:Vps21 100nM MC1	0.79853	0.00356	0.18544	0.00299	598.258	24.0601	2.45827e-05	0.9868			100	0.00167152
2019_02_12 REP-Vps21_GDI:Ypt7_100nMMC1	0.71631	0.00161	0.26104	0.00166	337.758	6.64024	3.60941e-05	0.99218			100	0.0029607
2019_01_18_no REP_GDI-Ypt7_50nMMC1	0.90722	0.05169	0.08907	0.05005	1587.55	1245.46	0.000117485	0.55151		no recruiter	50	0.000629903	50	0.000629903
2020_01_17 no recruiter	1.31908	1.07356	-0.32702	1.07262	-9753.9	30410	3.62402e-05	0.74352			100	-0.000102523	100	0.00101116	0.00157498
2019_01_15_no recruiter_100nM MC1	0.93672	0.00215	0.04009	0.00178	470.624	60.927	1.86701e-05	0.8386			100	0.00212484
2018_11_09_GDI-Ypt7_REP-Ypt31recruiter_100nMMC1	0.81013	0.01324	0.1757	0.01275	1008.94	105.312	7.44316e-06	0.98851		Ypt31	100	0.00099114	100	0.000875278	0.000354528
2019_01_15_REP:Ypt31 100nM MC1	0.8514	0.02365	0.12989	0.02322	2095.06	480.65	8.17904e-06	0.96159			100	0.000477314
2019_02_12 REP-Ypt31_GDI:Ypt7_100nMMC1	0.76451	0.01659	0.22519	0.01499	864.021	108.435	0.000131699	0.93745			100	0.00115738
2020_01_17 REP_Ypt52 25nM MC1	0.70845	0.06189	0.28465	0.0616	4199.1	1026.45	3.49852e-06	0.98875		Ypt52	25	0.000238147	25	0.000853943	0.000564837
2019_01_25_REP:Ypt52_GDI:Ypt7_25nMMC1	0.89167	0.00343	0.09853	0.00318	1024.87	56.2649	2.89981e-06	0.99085			25	0.000975733	50	0.00131319	0.00114943
2019_01_24_REP:Ypt52_GDI-Ypt7_25nMMC1	0.80264	0.00861	0.17728	0.00756	741.867	66.4266	6.37877e-05	0.95687			25	0.00134795	100	0.00180374	0.00121618
2019_01_24_REP:Ypt52_GDI-Ypt7_50nMMC1	0.84071	0.00329	0.14597	0.0029	750.313	30.9969	8.92597e-06	0.99069			50	0.00133278
2019_01_18_REP:Ypt52_GDI-Ypt7_50nMMC1	0.78471	0.00418	0.21876	0.00364	407.714	21.3928	0.000132606	0.95891			50	0.0024527
2020_01_17 REP_Ypt52 50nM MC1	0.39206	0.17015	0.60332	0.16982	6489.3	1975.15	4.64359e-06	0.99266			50	0.0001541
2020_01_17 REP_Ypt52 100nM MC1	0.77126	0.02202	0.20273	0.02168	2284.23	306.879	5.02664e-06	0.98859			100	0.000437784
2020_01_22 REP_Ypt52 100nM MC1 new buffer	0.64189	0.00125	0.34662	0.00104	453.637	4.13719	8.19806e-06	0.99891			100	0.00220441
2019_01_24_REP:Ypt52_GDI-Ypt7_100nMMC1	0.75439	0.00217	0.22038	0.00208	361.136	10.7459	5.32249e-05	0.9838			100	0.00276904
2019_01_24_REP:Ypt53_GDI-Ypt7_25nMMC1	0.80389	0.05679	0.19319	0.05502	1606.74	636.297	0.000135217	0.83253		Ypt53	25	0.000622379	25	0.00039572	0.000320544
2020_01_17 REP_Ypt53 25nM MC1	0.74042	0.09797	0.25439	0.09774	5915.02	2476.44	2.22959e-06	0.98343			25	0.000169061	50	0.000967607	0.000841332
2020_01_17 REP_Ypt53 50nM MC1	0.63097	0.28161	0.35933	0.28127	8353.38	6947.07	4.6346e-06	0.96772			50	0.000119712	100	0.000999169	0.00105813
2019_01_24_REP:Ypt53_GDI-Ypt7_50nMMC1	0.7829	0.02492	0.20863	0.02311	1019.48	192.448	0.000156232	0.90058			50	0.000980889
2019_01_18_REP:Ypt53_GDI-Ypt7_50nMMC1	0.81708	0.00389	0.19429	0.00322	554.872	24.3816	3.85673e-05	0.98212			50	0.00180222
2020_01_17 REP_Ypt53 100nM MC1	0.76198	0.08131	0.2216	0.08089	3984.76	1654.04	7.44431e-06	0.96485			100	0.000250956
2019_01_24_REP:Ypt53_GDI-Ypt7_100nMMC1	0.78855	0.00212	0.19022	0.00176	572.284	13.7027	1.02051e-05	0.9949			100	0.00174738
recruiter assays with Yck3
2019_02_18 buffer_GDI:Ypt7_50nMMC1_Yck3_ATP	0.89897	0.00584	0.05773	0.00552	1174.06	176.691	4.69592e-06	0.95064			50	0.000851743	no recruiter	0.000425865	0.000602282
2019_02_22 buffer_GDI:Ypt7_50nMMC1_ATP_Yck3	1684.79	9747.1	-1683.83	9747.1	-79405600	459651000	4.12339e-06	0.90122			50	-1.25936e-08	Ypt10 complete	0.00130786	0.000263315
2019_02_18 REP-Ypt10_GDI:Ypt7_50nMMC1_Yck3_ATP	0.78962	0.00667	0.1688	0.00606	891.53	58.9567	1.83895e-05	0.98308			50	0.00112167	Ypt10woYck3	0.00285562	4.59718e-05
2019_02_22 REP-Ypt10_GDI:Ypt7_50nMMC1_Yck3_ATP	0.72035	0.00179	0.2268	0.00154	669.321	10.2835	3.97131e-06	0.99843			50	0.00149405	Ypt10woATP	0.00419144	0.000609221
2019_02_18 REP-Ypt10_GDI:Ypt7_50nMMC1_w_oYck3 _ATP	0.69109	0.00115	0.24187	0.00115	346.245	5.14412	1.68476e-05	0.99572			50	0.00288813	Vps21 complete	0.000458943	4.64815e-05
2019_02_22 REP-Ypt10_GDI:Ypt7_50nMMC1_w_o_Yck3	0.67845	0.00132	0.2562	0.00128	354.218	5.57517	2.04849e-05	0.99535			50	0.00282312	Vps21wo Yck3	0.0016925	0.000195824
2019_02_18 REP-Ypt10_GDI:Ypt7_50nMMC1_Yck3_w_o _ATP	0.71854	0.000644771	0.218	0.000934447	265.911	3.04673	1.13077e-05	0.99646			50	0.00376066	Vps21 wo ATP	0.00184954	0.000365223
2019_02_22 REP-Ypt10_GDI:Ypt7_50nMMC1_w_o_ATP	0.66529	0.00054808	0.25844	0.00109	216.346	2.10167	1.33454e-05	0.99689			50	0.00462223
2019_02_22 REP-Vps21_GDI:Ypt7_50nMMC1_Yck3_ATP	0.69329	0.02914	0.25357	0.02871	2347	331.382	7.70551e-06	0.98824			50	0.000426076
2019_02_18 REP-Vps21_GDI:Ypt7_50nMMC1_Yck3_ATP	0.80891	0.0203	0.14439	0.01991	2033.3	361.82	6.45874e-06	0.97585			50	0.000491811
2019_02_22 REP-Vps21_GDI:Ypt7_50nMMC1_w_o_Yck3	0.72671	0.0018	0.21554	0.00149	546.158	10.0771	8.54103e-06	0.99676			50	0.00183097
2019_02_18 REP-Vps21_GDI:Ypt7_50nMMC1_w_oYck3_ATP	0.75362	0.00234	0.19202	0.00199	643.486	15.6039	7.8485e-06	0.9958			50	0.00155403
2019_02_22 REP-Vps21_GDI:Ypt7_50nMMC1_w_o_ATP	0.69982	0.00356	0.23599	0.00294	474.431	17.4609	5.5594e-05	0.98388			50	0.00210779
2019_02_18 REP-Vps21_GDI:Ypt7_50nMMC1_Yck3_w_oATP	0.74575	0.00535	0.20262	0.00453	628.422	33.5332	4.4939e-05	0.97914			50	0.00159129

## Sheet: Kcat Km
	conc s.c.MC1	AVERAGE	STDV
Ypt10	25	0.00187489	0.000234103
	50	0.00364875	0.00125974
	100	0.00437323	0.00145983
Vps21	25	0.00127596	0.000147666
	50	0.00172125	0.000877309
	100	0.00176261	0.000832278
no recruiter	100	0.00101116	0.00157498
Ypt31	100	0.000875278	0.000354528
Ypt52	25	0.000853943	0.000564837
	50	0.00131319	0.00114943
	100	0.00180374	0.00121618
Ypt53	25	0.00039572	0.000320544
	50	0.000967607	0.000841332
	100	0.000999169	0.00105813
