# Supplementary figures and images for: A conserved and regulated mechanism drives endosomal Rab transition
Source: eLife journal article supplement (doi:10.7554/elife.56090), 2020-05-11

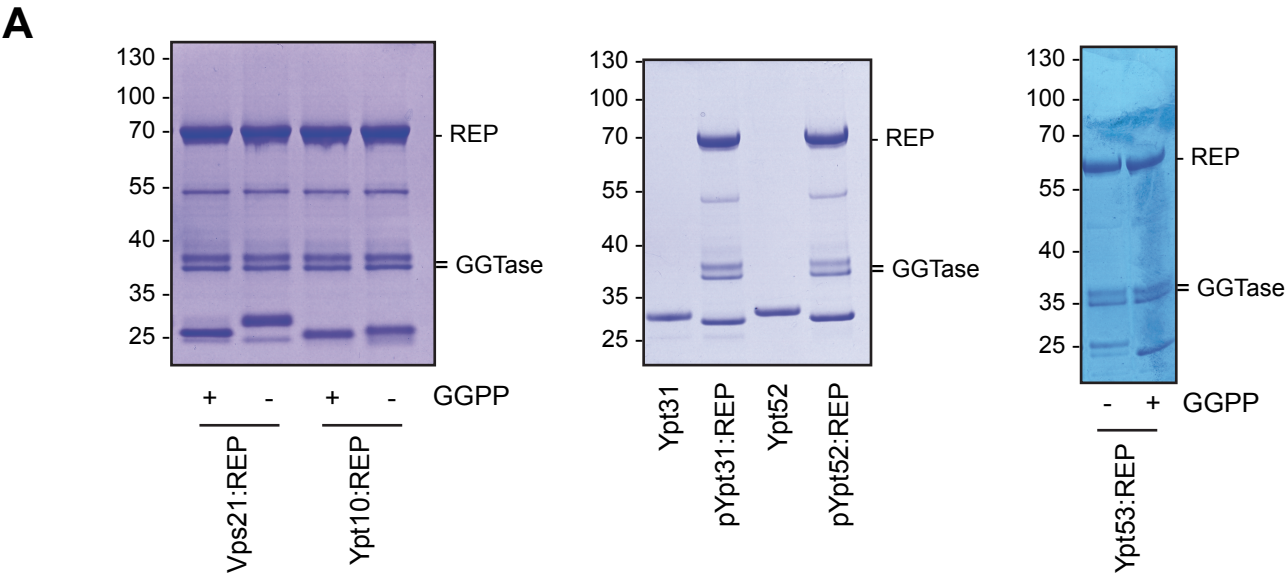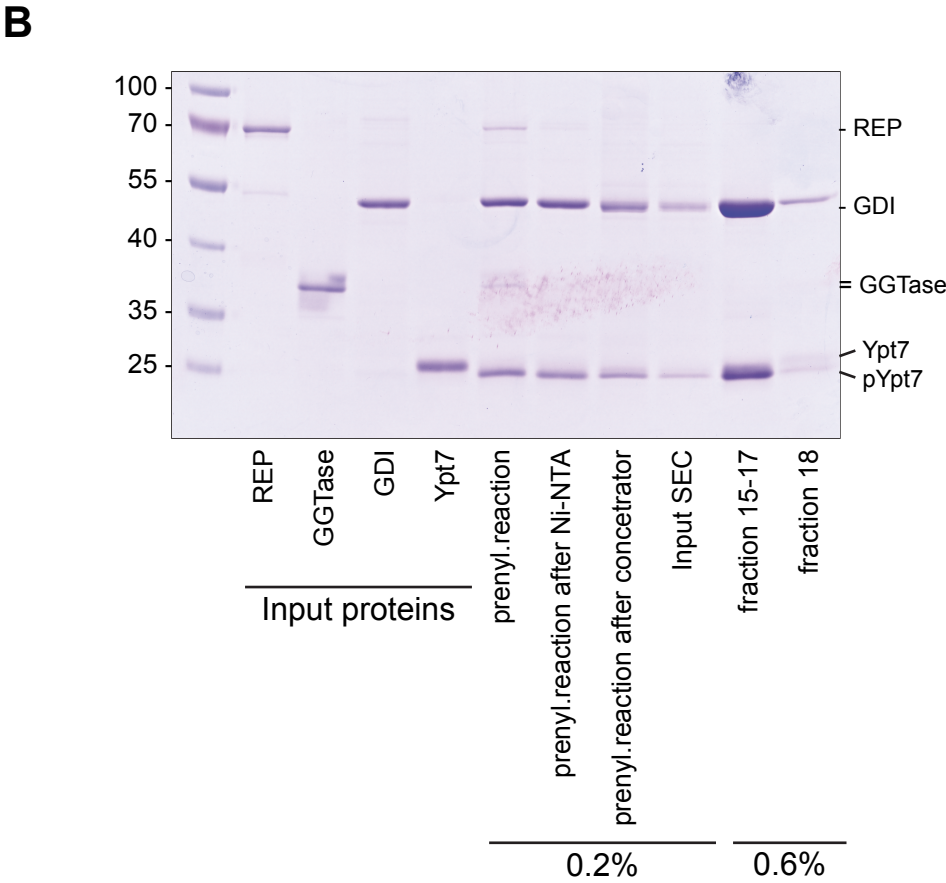

Supplement: supp [file elife-56090-supp-v1.zip]

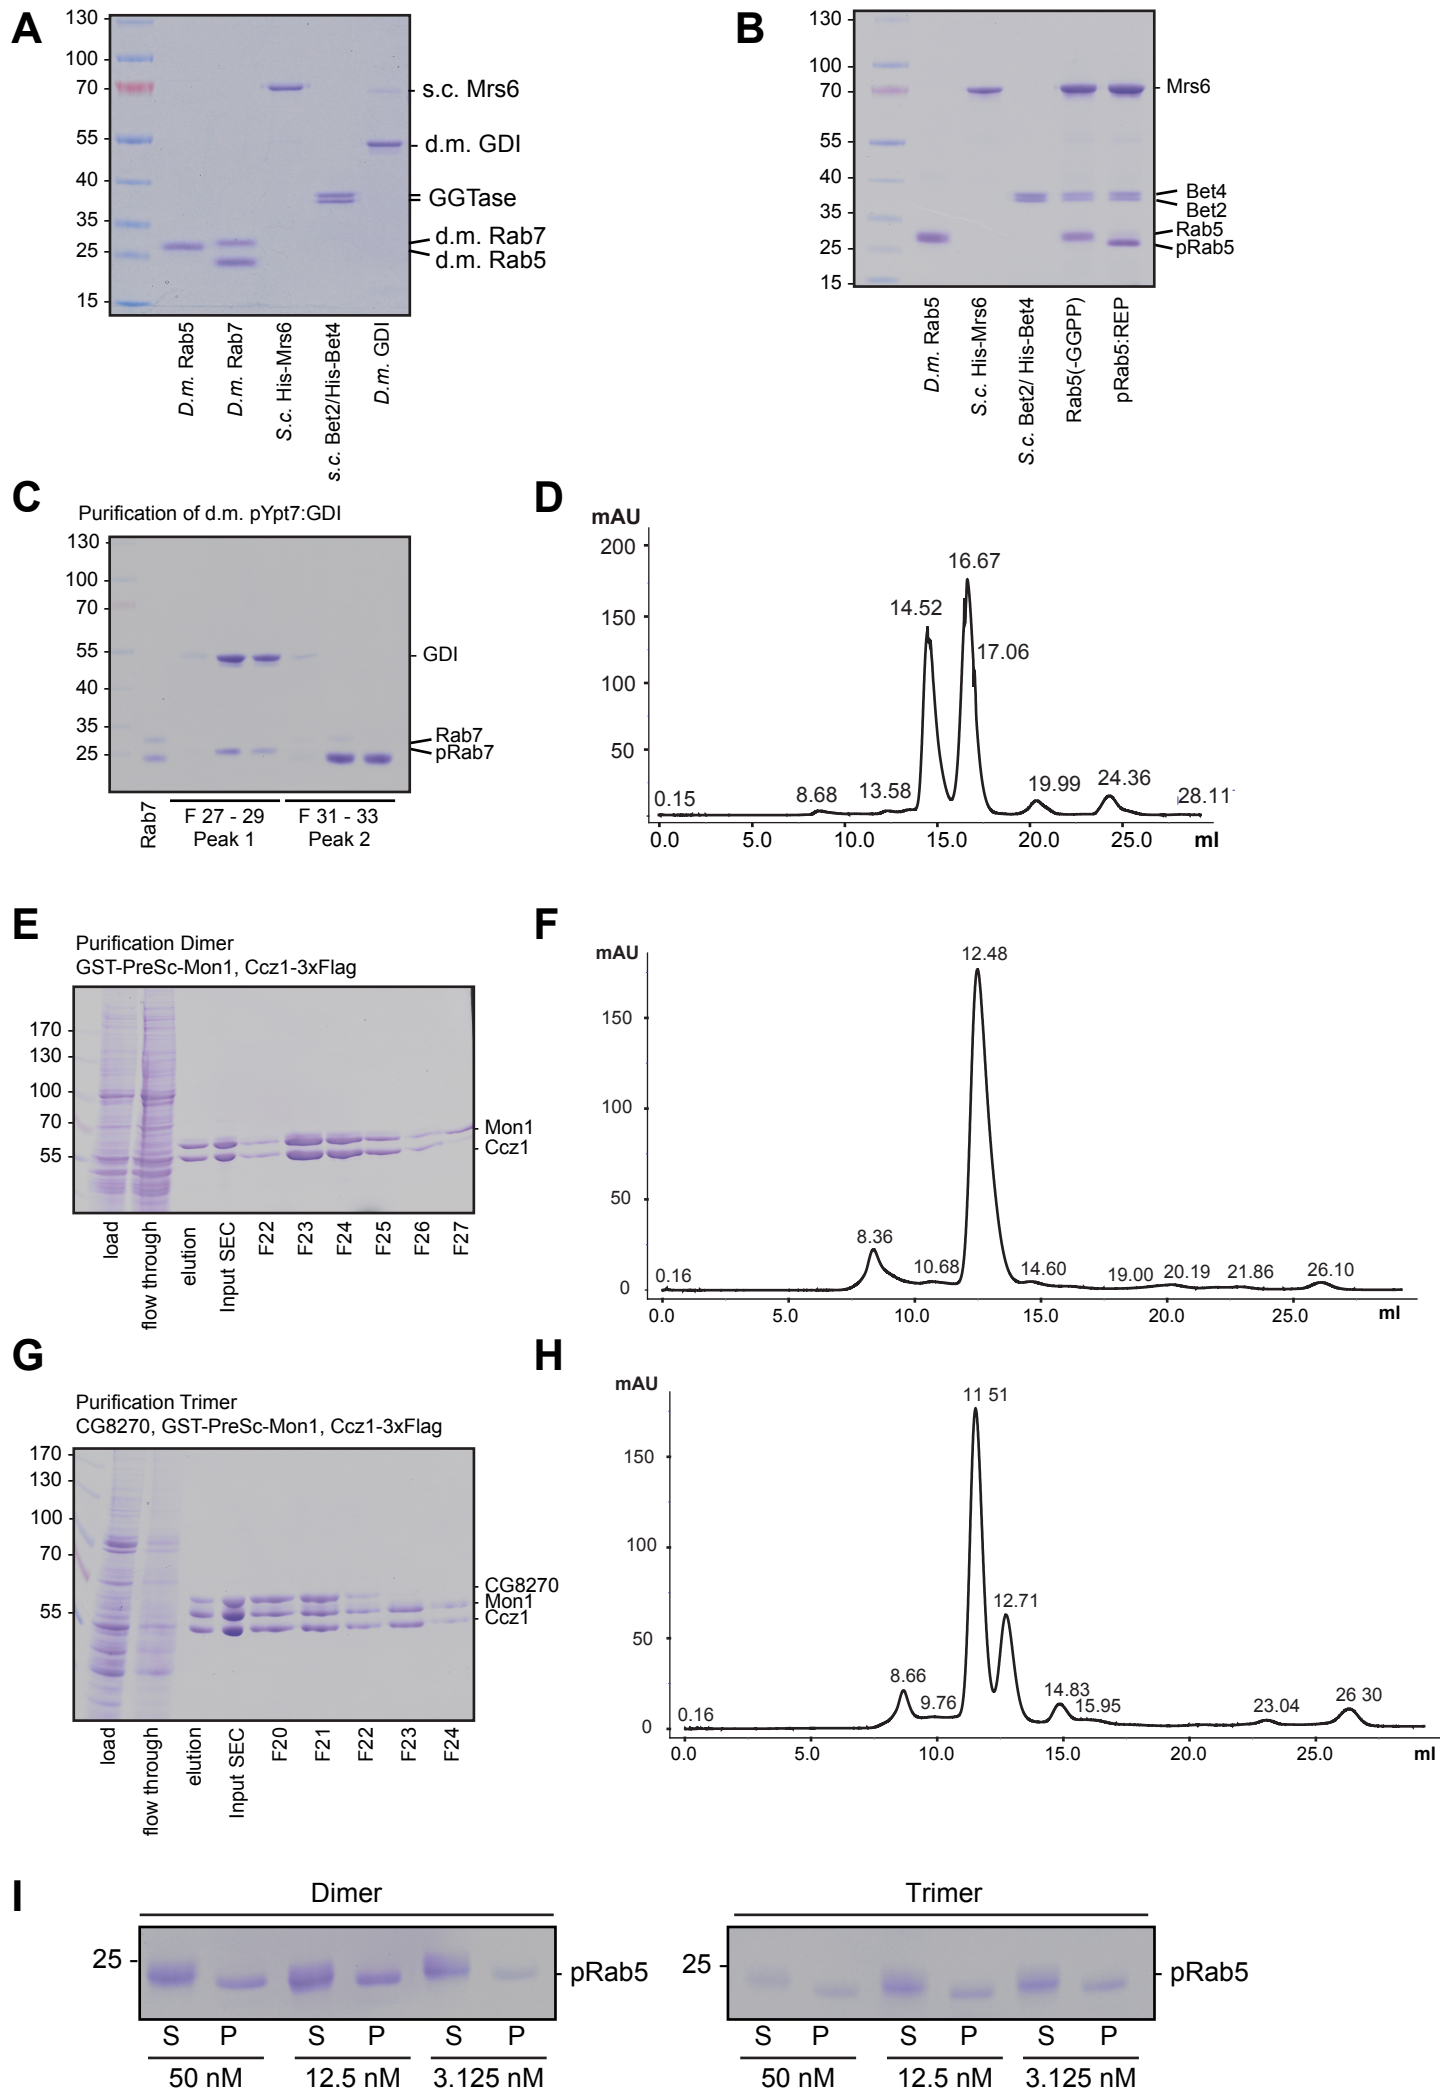

Supplement: supp [file elife-56090-supp-v1.zip]
